# Supplementary material
Source: PubMed Central journal article supplement (PMC4758885)
Supplement: NIHMS727022-supplement-ESI.pdf [file NIHMS727022-supplement-ESI.pdf]

**Quantitative evaluation of positive  $\phi$  angle propensity in flexible regions of proteins from three-bond  $J$  couplings**

Jung Ho Lee, Jinfu Ying and Ad Bax\*

Laboratory of Chemical Physics, National Institute of Diabetes and Digestive and Kidney Diseases, National Institutes of Health, Bethesda, MD 20892, USA

\* To whom correspondence should be addressed

Electronic Supplementary Information

**Table S1.**  $^3J_{\text{CH}\alpha}$ ,  $^3J_{\text{HNH}\alpha}$ ,  $^3J_{\text{C}'\text{C}'}$ ,  $^3J_{\text{HNC}'}$ , and  $^2J_{\text{CH}\alpha}$  coupling values in N-terminally acetylated  $\alpha$ -synuclein.

|     | $^3J_{\text{CH}\alpha}/\text{Hz}^a$ | $^3J_{\text{HNH}\alpha}/\text{Hz}^b$ | $^3J_{\text{C}'\text{C}'}/\text{Hz}^c$ | $^3J_{\text{HNC}'}/\text{Hz}^a$ | $^2J_{\text{CH}\alpha}/\text{Hz}^a$ |
|-----|-------------------------------------|--------------------------------------|----------------------------------------|---------------------------------|-------------------------------------|
| M1  | 2.36                                |                                      | 0.72                                   | 0.99                            | -4.66                               |
| D2  | 2.30                                |                                      | 0.74                                   | 0.98                            | -4.54                               |
| V3  | 2.12                                | 7.25                                 | 0.76                                   | 0.91                            | -4.89                               |
| F4  | 2.13                                | 7.13                                 | 0.78                                   | 0.96                            | -4.59                               |
| M5  | 2.58                                | 7.13                                 | 0.81                                   | 0.98                            | -4.80                               |
| K6  | 2.16                                | 6.11                                 | 0.74                                   | 1.02                            | -4.63                               |
| G7  | 3.92                                |                                      | 0.66                                   | 0.68                            | -5.00                               |
| L8  | 2.07                                | 7.01                                 | 0.73                                   | 0.66                            | -4.50                               |
| S9  | 2.07                                | 6.53                                 | 0.83                                   | 0.88                            | -4.37                               |
| K10 | 2.31                                |                                      | 0.89                                   | 1.11                            | -4.55                               |
| A11 | 1.76                                | 5.30                                 | 0.67                                   | 1.21                            | -3.79                               |
| K12 | 2.18                                | 6.64                                 | 0.81                                   | 0.90                            | -4.25                               |
| E13 | 2.12                                | 6.18                                 | 0.74                                   | 0.92                            | -4.21                               |
| G14 |                                     |                                      | 0.72                                   |                                 |                                     |
| V15 | 2.26                                | 7.37                                 | 0.83                                   | 0.72                            | -4.04                               |
| V16 | 2.18                                | 7.63                                 | 0.92                                   | 0.72                            | -3.99                               |
| A17 | 1.88                                | 5.45                                 | 0.71                                   | 1.32                            | -3.85                               |
| A18 | 1.88                                | 5.22                                 | 0.76                                   | 1.24                            | -4.01                               |
| A19 | 1.85                                | 5.28                                 | 0.73                                   | 1.19                            | -4.17                               |
| E20 | 1.92                                | 6.13                                 | 0.67                                   | 0.82                            | -4.16                               |
| K21 | 2.16                                | 6.53                                 | 0.80                                   | 0.84                            | -4.52                               |
| T22 | 2.22                                | 6.99                                 | 0.83                                   | 0.82                            | -4.72                               |
| K23 | 2.22                                | 6.65                                 | 0.84                                   | 0.89                            | -4.39                               |
| Q24 | 2.08                                | 6.69                                 | 0.86                                   | 0.75                            | -4.23                               |
| G25 |                                     |                                      | 0.72                                   |                                 |                                     |
| V26 | 2.24                                | 7.12                                 | 0.88                                   | 0.98                            | -4.29                               |
| A27 | 1.89                                | 5.58                                 | 0.73                                   | 1.06                            | -4.16                               |
| E28 | 1.92                                | 6.08                                 | 0.70                                   | 1.04                            | -4.22                               |
| A29 | 2.01                                |                                      | 0.73                                   | 1.17                            | -4.23                               |
| A30 | 2.02                                |                                      | 0.71                                   | 1.26                            | -4.27                               |
| G31 | 3.69                                |                                      | 0.75                                   | 0.54                            | -4.96                               |
| K32 | 2.26                                | 7.01                                 | 0.86                                   | 0.64                            | -4.47                               |
| T33 | 2.33                                | 7.22                                 | 0.93                                   | 0.70                            | -4.49                               |
| K34 | 2.31                                |                                      | 0.91                                   | 0.95                            | -4.36                               |
| E35 |                                     | 6.30                                 |                                        | 0.80                            | -4.23                               |
| G36 |                                     |                                      | 0.72                                   |                                 |                                     |
| V37 | 2.32                                | 7.50                                 | 0.86                                   | 0.59                            | -4.15                               |

|     |      |      |                   |      |       |
|-----|------|------|-------------------|------|-------|
| L38 | 2.25 | 7.04 | 0.73 <sup>d</sup> | 0.58 | -4.20 |
| Y39 | 2.40 | 7.47 | 0.98              | 0.80 | -3.89 |
| V40 | 2.62 | 8.01 | 1.16              | 0.83 | -4.53 |
| G41 | 3.84 |      | 0.82              | 1.01 | -4.66 |
| S42 | 2.34 | 6.49 | 0.87              | 0.93 | -4.19 |
| K43 | 2.34 | 7.00 | 0.85              | 0.82 | -4.55 |
| T44 | 2.40 | 7.26 | 0.87              | 0.78 | -4.54 |
| K45 | 2.33 | 6.65 | 0.86              | 0.91 | -4.44 |
| E46 |      | 6.37 | 0.73              | 0.93 | -4.24 |
| G47 |      |      | 0.74              |      |       |
| V48 | 2.27 | 7.58 | 0.87              | 0.68 | -3.99 |
| V49 | 2.50 |      | 0.98              | 0.50 | -3.98 |
| H50 | 2.77 | 7.59 | 1.09              | 1.00 | -4.41 |
| G51 |      |      | 0.84              |      |       |
| V52 | 2.41 |      | 0.99              | 0.82 | -4.11 |
| A53 | 2.07 | 5.79 | 0.75              | 1.12 | -3.77 |
| T54 | 2.33 | 7.56 | 0.93              | 0.70 | -4.49 |
| V55 | 2.40 |      | 0.99              | 0.92 | -4.17 |
| A56 | 2.04 | 5.61 | 0.74              | 1.03 | -3.84 |
| E57 | 1.89 | 6.15 | 0.72              | 1.00 | -3.96 |
| K58 | 2.15 | 6.57 | 0.79              | 0.95 | -4.23 |
| T59 | 2.32 | 7.01 | 0.81              | 0.88 | -4.39 |
| K60 | 2.15 |      | 0.83              | 1.03 | -4.44 |
| E61 | 2.04 | 6.17 | 0.72              | 0.80 | -3.98 |
| Q62 | 2.21 | 7.01 | 0.83              | 0.83 | -4.14 |
| V63 | 2.29 | 7.70 | 0.93              | 0.82 | -4.11 |
| T64 | 2.58 | 7.87 | 1.01              | 0.97 | -4.74 |
| N65 | 3.02 | 7.51 | 0.93              | 0.88 | -4.62 |
| V66 | 2.43 | 7.34 | 0.91              | 0.95 | -4.53 |
| G67 |      |      | 0.76              | 0.78 |       |
| G68 | 4.03 |      | 0.78              | 0.74 | -4.84 |
| A69 | 1.98 | 5.83 | 0.74              | 1.11 | -3.78 |
| V70 | 2.31 | 7.53 | 0.87              | 0.68 | -3.72 |
| V71 | 2.43 | 8.15 | 1.12              | 0.61 | -3.95 |
| T72 | 2.50 | 7.70 | 1.02              | 1.00 | -4.80 |
| G73 | 3.90 |      | 0.78              | 0.94 | -4.85 |
| V74 | 2.34 |      | 0.90              | 0.75 | -4.17 |
| T75 | 2.38 | 7.62 | 0.95              | 0.80 | -4.56 |
| A76 | 2.05 | 5.87 | 0.81              | 1.12 | -3.88 |
| V77 | 2.23 | 7.45 | 0.93              | 0.80 | -4.01 |
| A78 | 2.01 | 5.62 | 0.71              | 1.30 | -3.75 |

|      |      |      |                   |      |       |
|------|------|------|-------------------|------|-------|
| Q79  | 2.09 | 6.79 | 0.82              | 0.93 | -4.02 |
| K80  | 2.21 | 6.71 | 0.86              | 0.99 | -4.10 |
| T81  | 2.33 | 7.52 | 0.93              | 0.66 | -4.17 |
| V82  | 2.36 | 7.65 | 0.98              | 0.83 | -4.18 |
| E83  | 2.06 | 6.19 | 0.78              | 0.97 | -3.96 |
| G84  | 3.78 |      | 0.79              | 0.65 | -4.93 |
| A85  | 2.12 | 5.64 | 0.71              | 1.40 | -4.43 |
| G86  | 3.89 |      | 0.72              | 0.65 | -4.99 |
| S87  | 2.24 | 6.82 | 0.90              | 0.94 | -4.61 |
| I88  | 2.32 | 7.46 | 0.89              | 0.80 | -4.39 |
| A89  | 1.89 | 5.57 | 0.73              | 1.30 | -3.97 |
| A90  | 1.85 | 5.62 |                   | 0.98 | -4.05 |
| A91  | 1.99 | 5.77 | 0.71              | 1.04 | -4.11 |
| T92  | 2.39 | 7.50 | 0.99              | 0.79 | -5.09 |
| G93  | 3.98 |      | 0.76              | 0.40 | -4.81 |
| F94  | 2.21 | 6.92 | 0.94              | 0.89 | -4.02 |
| V95  | 2.51 | 8.04 | 1.22              | 0.74 | -3.85 |
| K96  | 2.03 | 6.51 | 0.71              | 0.97 | -3.68 |
| K97  |      |      | 0.92              |      |       |
| D98  | 2.45 | 6.72 | 0.72 <sup>d</sup> | 0.82 | -4.53 |
| Q99  | 2.42 | 7.23 | 0.89              | 0.88 | -4.78 |
| L100 | 2.26 | 6.80 | 0.71              | 0.86 | -4.66 |
| G101 | 3.99 |      | 0.72              | 0.69 | -4.60 |
| K102 | 2.24 | 6.83 | 0.91              | 1.10 | -4.39 |
| N103 | 3.01 | 7.20 | 0.84              | 0.91 | -4.84 |
| E104 | 2.30 | 6.79 | 0.82              | 0.89 | -4.59 |
| E105 | 2.12 | 6.39 | 0.74              | 0.90 | -4.33 |
| G106 | 3.82 |      | 0.79              | 0.65 | -5.03 |
| A107 | 1.89 | 5.92 |                   | 1.12 | -3.09 |
| Q109 | 2.35 | 6.94 | 0.89              | 0.77 | -4.29 |
| E110 | 2.21 | 6.52 | 0.82              | 0.98 | -4.20 |
| G111 | 3.64 |      | 0.75              | 0.73 | -4.47 |
| I112 | 2.39 | 7.75 | 0.89              | 0.69 | -4.10 |
| L113 | 2.35 | 7.16 | 0.79              | 0.87 | -4.15 |
| E114 | 2.31 | 6.72 | 0.84              | 1.00 | -4.34 |
| D115 | 2.82 | 6.85 | 0.83              | 0.84 | -4.23 |
| M116 | 2.45 | 7.17 |                   | 0.72 | -3.47 |
| V118 | 2.39 | 7.68 | 0.91              | 0.63 | -4.05 |
| D119 |      | 6.79 |                   | 0.97 |       |
| D121 | 2.49 | 7.14 |                   | 0.42 | -4.91 |
| N122 | 2.69 | 7.29 |                   | 0.72 | -5.00 |

|      |      |      |      |      |       |
|------|------|------|------|------|-------|
| E123 | 2.24 | 6.55 | 0.71 | 0.95 | -4.59 |
| A124 | 2.18 | 6.23 | 0.81 | 0.89 | -4.20 |
| Y125 | 2.28 | 7.09 | 1.05 | 0.96 | -4.26 |
| E126 | 2.45 | 7.29 | 1.05 | 0.75 | -3.97 |
| M127 | 2.02 | 6.62 |      | 1.17 | -3.34 |
| S129 | 2.15 | 6.65 | 0.93 | 0.91 | -4.16 |
| E130 | 2.32 | 6.86 | 0.88 | 0.88 | -4.53 |
| E131 | 2.09 | 6.41 |      | 0.98 | -4.29 |
| G132 | 3.94 |      | 0.79 | 0.82 | -4.73 |
| Y133 | 2.29 | 6.77 | 0.96 | 1.00 | -4.17 |
| Q134 | 2.50 | 7.55 | 1.16 | 1.04 | -4.53 |
| D135 | 2.61 | 6.97 |      | 1.03 | -4.62 |
| Y136 | 2.23 | 7.17 | 1.11 | 1.04 | -4.06 |
| E137 | 2.47 | 7.63 |      | 0.94 | -3.58 |
| E139 | 2.19 | 6.71 | 0.74 | 0.84 | -4.02 |
| A140 | 2.07 | 6.65 |      | 1.43 | -5.06 |

<sup>a</sup> $^3J_{C^H\alpha}$ , <sup>2</sup> $J_{C^H\alpha}$ , and <sup>2</sup> $J_{HNC}$  couplings are measured for a <sup>13</sup>C/<sup>15</sup>N-enriched  $\alpha$ -synuclein sample in 20 mM sodium phosphate, 50 mM NaCl, and 5% D<sub>2</sub>O at pH 6, 288 K, and 600 MHz <sup>1</sup>H frequency.

<sup>b</sup> $^3J_{HNH\alpha}$  couplings are from <sup>1</sup>.

<sup>c</sup> $^3J_{C'C'}$  couplings are measured under the same condition as above, except for 20 mM NaCl and a <sup>1</sup>H frequency of 900 MHz. Correlation between the <sup>3</sup> $J_{C'C'}$  couplings in this table and Lee et al. <sup>2</sup> is shown in ESI Fig. S1.

<sup>d</sup> $^3J_{C'C'}$  coupling from Lee et al. <sup>2</sup>.

**Table S2.**  ${}^3J_{\text{CH}\alpha}$  and  ${}^2J_{\text{CH}\alpha}$  coupling values in GB3. <sup>a</sup>

|     | ${}^3J_{\text{CH}\alpha}/\text{Hz}$ | ${}^2J_{\text{CH}\alpha}/\text{Hz}$ |
|-----|-------------------------------------|-------------------------------------|
| M1  |                                     | -3.45                               |
| Q2  | 2.61                                | -3.53                               |
| Y3  | 2.81                                | -4.35                               |
| K4  | 3.06                                | -4.31                               |
| L5  | 3.23                                | -3.15                               |
| V6  | 2.83                                | -3.58                               |
| I7  | 3.11                                | -3.46                               |
| N8  | 3.49                                | -4.46                               |
| K10 | 1.56                                | -5.41                               |
| T11 | 3.1                                 | -6.73                               |
| L12 | 2.39                                | -3.48                               |
| K13 | 2.84                                | -3.98                               |
| E15 | 2.57                                |                                     |
| T16 |                                     | -5.96                               |
| T17 | 3.14                                | -5.32                               |
| T18 | 2.67                                | -4.92                               |
| K19 | 2.83                                | -4.07                               |
| A20 | 2.53                                | -4.85                               |
| V21 | 2.33                                | -5.53                               |
| D22 | 2.18                                | -5.61                               |
| A23 | 1.73                                | -4.97                               |
| E24 | 1.32                                | -4.78                               |
| T25 |                                     | -5.78                               |
| A26 | 0.94                                | -5.42                               |
| K28 | 1.14                                | -5.16                               |
| A29 | 1.05                                |                                     |
| F30 |                                     | -6.52                               |
| K31 | 1.2                                 | -5.71                               |
| Q32 | 1.2                                 | -5.01                               |
| Y33 | 0.96                                | -4.55                               |
| A34 | 1.06                                | -5.18                               |
| N35 | 1.15                                | -5.27                               |
| D36 | 1.35                                | -5.63                               |
| N37 | 2.68                                | -6.45                               |
| V39 | 2.63                                | -3.66                               |
| D40 | 2.33                                | -4.17                               |
| V42 | 2.38                                | -3.09                               |
| W43 | 2.86                                | -3.5                                |

|     |      |       |
|-----|------|-------|
| T44 | 3.21 |       |
| Y45 |      | -4.39 |
| D46 | 3.2  | -3.67 |
| D47 | 1.68 |       |
| A48 | 1.44 | -5.61 |
| T49 | 2.81 | -6.3  |
| K50 | 6.7  | -6.46 |
| T51 | 3.01 |       |
| F52 |      | -4.18 |
| T53 | 3.01 |       |
| V54 |      | -4.46 |
| T55 | 3.19 | -4.33 |
| E56 | 2.34 |       |

---

$^a$   $^3J_{C^H\alpha}$  and  $^2J_{C^H\alpha}$  couplings are measured for a uniformly  $^{13}C/^{15}N$ -enriched 1.2 mM GB3 sample in 50 mM sodium phosphate, 50 mM NaCl, and 5%  $D_2O$  at pH 6.5, 288 K, and 600 MHz  $^1H$  frequency.

**Table S3.**  ${}^3J_{\text{CH}\alpha}$  and  ${}^2J_{\text{CH}\alpha}$  coupling values in ubiquitin. <sup>a</sup>

|     | ${}^3J_{\text{CH}\alpha}/\text{Hz}$ | ${}^2J_{\text{CH}\alpha}/\text{Hz}$ |
|-----|-------------------------------------|-------------------------------------|
| M1  |                                     | -4.14                               |
| Q2  | 2.76                                | -4.02                               |
| I3  | 3.19                                | -5.65                               |
| F4  | 3.16                                |                                     |
| V5  |                                     | -4.05                               |
| K6  | 2.71                                | -3.69                               |
| T7  | 2.5                                 |                                     |
| L8  | 1.68                                | -5.4                                |
| T9  | 2.26                                |                                     |
| K11 | 1.69                                | -3.21                               |
| T12 | 3.14                                | -4.63                               |
| I13 | 3                                   | -4.08                               |
| T14 | 2.97                                | -4.18                               |
| L15 | 3.14                                | -4.62                               |
| E16 | 2.63                                | -3.58                               |
| V17 | 2.76                                |                                     |
| E18 | 3.07                                |                                     |
| P19 |                                     | -4.82                               |
| S20 | 2.06                                | -5.35                               |
| D21 | 1.11                                | -3.39                               |
| T22 | 1.91                                | -4.64                               |
| I23 | 1.43                                |                                     |
| E24 |                                     | -5.22                               |
| N25 | 1.23                                |                                     |
| V26 |                                     | -5.49                               |
| K27 | 1.1                                 | -5.57                               |
| A28 | 1.14                                |                                     |
| K29 | 1.65                                | -5.48                               |
| I30 | 1.14                                | -5.64                               |
| Q31 | 0.91                                | -4.86                               |
| D32 | 1.2                                 |                                     |
| K33 |                                     | -5.82                               |
| E34 | 2.9                                 |                                     |
| I36 | 2.23                                |                                     |
| P38 |                                     | -4.74                               |
| D39 | 1.67                                |                                     |
| Q40 | 2.69                                | -6.01                               |
| Q41 | 1.98                                | -3.58                               |



|     |      |       |
|-----|------|-------|
| R42 | 2.92 |       |
| L43 |      | -4.55 |
| I44 | 3.01 | -4.11 |
| F45 | 2.87 | -4.05 |
| A46 | 6.89 |       |
| K48 | 2.54 | -3.87 |
| Q49 | 1.83 | -3.21 |
| L50 | 2.53 | -3.45 |
| E51 | 2.57 |       |
| D52 | 1.2  |       |
| R54 | 2.13 | -4.35 |
| T55 | 3.08 |       |
| L56 | 1.04 |       |
| S57 | 1.35 |       |
| D58 | 1.7  | -5.88 |
| Y59 | 2.56 | -5.63 |
| N60 | 6.85 | -5.9  |
| I61 | 2.13 | -3.01 |
| Q62 | 2.87 |       |
| K63 | 1.1  | -2.98 |
| E64 | 6.99 | -7.05 |
| S65 | 1.31 | -3.62 |
| T66 | 3.29 | -4.48 |
| L67 | 2.91 |       |
| H68 | 3.45 | -4.28 |
| L69 | 2.64 | -3.62 |
| V70 | 3.04 | -4.39 |
| L71 | 2.36 | -4.19 |
| R72 | 2.1  | -3.73 |
| L73 | 2.29 | -4.06 |
| R74 | 2.12 | -4.07 |

---

$^a$   $^3J_{C^H\alpha}$  and  $^2J_{C^H\alpha}$  couplings are measured for a uniformly  $^{13}C/^{15}N$ -enriched 2.8 mM ubiquitin sample in 20 mM imidazole and 7% D2O at pH 6.0, 288 K, and 600 MHz  $^1H$  frequency.

**Table S4.** Parameters calculated from the newly generated coil database<sup>3</sup> for  $\phi > 0$  conformations.

|     | $N(\phi < 0)^a$ | $N(\phi > 0)^b$ | $\langle {}^3J_{CH\alpha}(\phi > 0) \rangle^c$ | $\langle {}^3J_{HNH\alpha}(\phi > 0) \rangle$ | $\langle {}^3J_{CC'}(\phi > 0) \rangle$ |
|-----|-----------------|-----------------|------------------------------------------------|-----------------------------------------------|-----------------------------------------|
| ARG | 8764            | 354             | 6.53                                           | 6.92                                          | 0.62                                    |
| LYS | 10657           | 347             | 6.53                                           | 6.90                                          | 0.64                                    |
| ASP | 11034           | 743             | 6.79                                           | 7.20                                          | 0.56                                    |
| GLU | 11836           | 352             | 6.37                                           | 6.74                                          | 0.74                                    |
| SER | 13273           | 386             | 6.17                                           | 6.51                                          | 0.77                                    |
| THR | 12905           | 110             | 5.93                                           | 6.10                                          | 0.81                                    |
| ASN | 7492            | 1168            | 6.90                                           | 7.35                                          | 0.55                                    |
| GLN | 6320            | 219             | 6.48                                           | 6.88                                          | 0.68                                    |
| ALA | 11346           | 314             | 6.23                                           | 6.61                                          | 0.77                                    |
| VAL | 9802            | 72              | 5.89                                           | 6.14                                          | 0.88                                    |
| ILE | 6939            | 36              | 6.15                                           | 6.44                                          | 0.83                                    |
| LEU | 10625           | 274             | 6.53                                           | 6.90                                          | 0.63                                    |
| MET | 2208            | 75              | 6.78                                           | 7.15                                          | 0.53                                    |
| PHE | 5873            | 273             | 6.86                                           | 7.30                                          | 0.54                                    |
| TYR | 5442            | 177             | 6.69                                           | 7.12                                          | 0.60                                    |
| TRP | 1984            | 54              | 6.55                                           | 7.06                                          | 0.66                                    |
| HIS | 4573            | 258             | 6.58                                           | 7.03                                          | 0.65                                    |
| CYS | 1944            | 89              | 6.84                                           | 7.29                                          | 0.53                                    |
| GLY | 6667            | 10199           | 5.19                                           | 5.05                                          | 0.87                                    |
| PRO | 25206           | 5               | 5.39                                           | 5.03                                          | 0.99                                    |

<sup>a</sup> Total number of  $\phi < 0$  residues for each amino acid type in the coil database.

<sup>b</sup> Total number of  $\phi > 0$  residues for each amino acid type in the coil database.

<sup>c</sup> The rigid limit Karplus equation,  ${}^3J_{CH\alpha} = 4.17 \times \cos^2(\phi - 60^\circ) + 2.00 \times \cos(\phi - 60^\circ) + 1.02$ , was used to calculate  ${}^3J_{CH\alpha}$  couplings for all  $\phi > 0$  residues for each amino acid type and averaged afterwards. The procedure was used to calculate the next two columns using rigid limit Karplus equations.<sup>2</sup>

**Table S5.** Positive  $\phi$  population ( $P^+$ ) calculated by the MERA webserver,<sup>3</sup> by the interpolation method using  ${}^3J_{\text{HNH}\alpha}$  and  ${}^3J_{\text{CH}\alpha}$ , and by the iterative method using  ${}^3J_{\text{HNH}\alpha}$ ,  ${}^3J_{\text{CC}}$ , and  ${}^3J_{\text{CH}\alpha}$ .<sup>a</sup>

|     | $P^+$ (MERA) / % | $P^+$ (interpolation method) / % | $P^+$ (iterative method) / % |
|-----|------------------|----------------------------------|------------------------------|
| D2  | 4                |                                  |                              |
| V3  | 0                | -5                               | -4                           |
| F4  | 4                | -3                               | -3                           |
| M5  | 4                | 7                                | 7                            |
| K6  | 2                | 3                                | 3                            |
| L8  | 3                | -4                               | -3                           |
| S9  | 2                | -1                               | -1                           |
| K10 | 4                |                                  |                              |
| A11 | 2                | -2                               | -2                           |
| K12 | 2                | 1                                | 1                            |
| E13 | 2                | 2                                | 2                            |
| V15 | 0                | -2                               | -1                           |
| V16 | 0                | -6                               | -5                           |
| A17 | 2                | 0                                | 0                            |
| A18 | 2                | 1                                | 0                            |
| A19 | 2                | 0                                | -1                           |
| E20 | 1                | -2                               | -2                           |
| K21 | 2                | 1                                | 1                            |
| T22 | 0                | 0                                | 0                            |
| K23 | 3                | 2                                | 1                            |
| Q24 | 5                | -2                               | -2                           |
| V26 | 0                | -1                               | -1                           |
| A27 | 2                | 0                                | -1                           |
| E28 | 2                | -2                               | -2                           |
| A29 | 3                |                                  |                              |
| A30 | 3                |                                  |                              |
| K32 | 3                | 1                                | 1                            |
| T33 | 0                | 1                                | 1                            |
| K34 | 4                |                                  |                              |
| E35 | 1                |                                  |                              |
| V37 | 0                | -1                               | -1                           |
| L38 | 2                | 0                                | 1                            |
| Y39 | 5                | 1                                | 1                            |
| V40 | 0                | 4                                | 3                            |
| S42 | 4                | 6                                | 5                            |
| K43 | 4                | 3                                | 3                            |

|     |    |    |    |
|-----|----|----|----|
| T44 | 0  | 3  | 3  |
| K45 | 3  | 4  | 4  |
| E46 | 1  |    |    |
| V48 | 0  | -3 | -3 |
| V49 | 0  |    |    |
| H50 | 8  | 9  | 9  |
| V52 | 0  |    |    |
| A53 | 2  | 3  | 2  |
| T54 | 0  | -1 | -1 |
| V55 | 0  |    |    |
| A56 | 2  | 3  | 3  |
| E57 | 1  | -3 | -3 |
| K58 | 2  | 1  | 1  |
| T59 | 0  | 2  | 2  |
| K60 | 2  |    |    |
| E61 | 2  | 0  | 0  |
| Q62 | 2  | -1 | 0  |
| V63 | 0  | -3 | -3 |
| T64 | 0  | 4  | 3  |
| N65 | 13 | 15 | 14 |
| V66 | 0  | 3  | 3  |
| A69 | 2  | 1  | 0  |
| V70 | 0  | -2 | -1 |
| V71 | 0  | -3 | -3 |
| T72 | 0  | 3  | 2  |
| V74 | 0  |    |    |
| T75 | 0  | 0  | 0  |
| A76 | 3  | 2  | 1  |
| V77 | 0  | -3 | -3 |
| A78 | 3  | 2  | 2  |
| Q79 | 2  | -2 | -2 |
| K80 | 1  | 1  | 1  |
| T81 | 0  | -1 | -1 |
| V82 | 0  | -1 | -1 |
| E83 | 2  | 1  | 0  |
| A85 | 3  | 5  | 5  |
| S87 | 3  | 1  | 1  |
| I88 | 0  | -1 | -1 |
| A89 | 2  | 0  | -1 |
| A90 | 2  | -1 |    |
| A91 | 2  | 1  | 1  |

|      |    |    |    |
|------|----|----|----|
| T92  | 0  | 1  | 1  |
| F94  | 3  | 0  | 0  |
| V95  | 0  | 0  | 0  |
| K96  | 4  | -2 | -1 |
| K97  | 5  |    |    |
| D98  | 8  | 6  | 7  |
| Q99  | 3  | 3  | 3  |
| L100 | 2  | 2  | 2  |
| K102 | 4  | 1  | 1  |
| N103 | 15 | 16 | 16 |
| E104 | 3  | 3  | 3  |
| E105 | 4  | 1  | 1  |
| A107 | 2  | -2 |    |
| Q109 | 2  | 3  | 3  |
| E110 | 2  | 2  | 2  |
| I112 | 0  | -1 | -1 |
| L113 | 2  | 2  | 2  |
| E114 | 3  | 4  | 3  |
| D115 | 6  | 14 | 14 |
| M116 | 6  | 4  |    |
| V118 | 0  | 0  | 0  |
| D119 | 7  |    |    |
| D121 | 5  | 5  |    |
| N122 | 12 | 8  |    |
| E123 | 3  | 3  | 3  |
| A124 | 3  | 3  | 3  |
| Y125 | 2  | 1  | 0  |
| E126 | 2  | 4  | 3  |
| M127 | 4  | -3 |    |
| S129 | 2  | 0  | -1 |
| E130 | 2  | 3  | 3  |
| E131 | 2  | 0  |    |
| Y133 | 3  | 3  | 2  |
| Q134 | 2  | 3  | 3  |
| D135 | 7  | 8  |    |
| Y136 | 3  | -1 | -1 |
| E137 | 2  | 2  |    |
| E139 | 4  | 1  | 1  |
| A140 | 1  | -2 |    |

---

<sup>a</sup>  $P^+$  errors for both iterative and interpolation methods are dominated by the intrinsic uncertainty in the  ${}^3J_{C^H\alpha}$  Karplus curve, estimated at 0.25 Hz based on the fits to ubiquitin and GB3  $\phi$  angles, yielding  $P^+$  uncertainties of *ca* 5%. The true error is likely to be somewhat smaller, since factors other than  $\phi$  backbone torsion angle would largely average to zero in IDPs and IDRs.

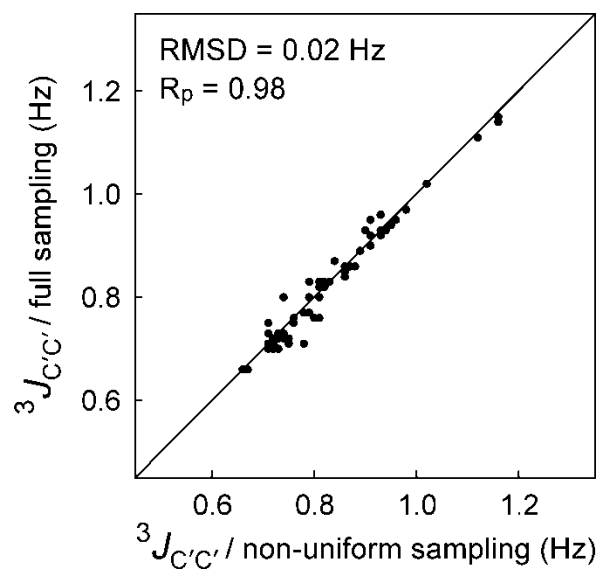

**Fig. S1** Correlation between  ${}^3J_{C'C'}$  coupling values derived from HN(COCO)NH with a full sampling scheme<sup>2</sup> and HN(COCO)NH with a 2.5% non-uniform sampling scheme.

1. J. Roche, J. Ying, A. S. Maltsev and A. Bax, *ChemBioChem*, 2013, **14**, 1754-1761.
2. J. H. Lee, F. Li, A. Grishaev and A. Bax, *J. Am. Chem. Soc.*, 2015, **137**, 1432-1435.
3. A. B. Mantsyzov, Y. Shen, J. H. Lee, G. Hummer and A. Bax, *J. Biomol. NMR*, 2015, **in press**.
